# Supplementary material
Source: publisher site journal article supplement (https://content.cld.iop.org/journals/1748-9326/9/10/104004/revision1/erl501291suppdata.pdf)
Supplement: Supplementary file 1 [file erl501291suppdata.pdf]

## SUPPLMENTAL MATERIALS

### *Section S-1: Description of Data Use and Availability*

#### S-1.1 URBAN SOURCE LOCATIONS

##### **City Water Map**

The City Water Map is a global survey of water sources for large cities with populations greater than 750,000 in 2010. This database identifies the names and spatial coordinates of the primary water sources and water providers for 265 urban areas. More detailed information on the City Water Map is available within the supplementary data found in McDonald et al. 2014.

##### **HydroSHEDS**

<http://hydrosheds.cr.usgs.gov/>

HydroSHEDS is a high-resolution database of hydrographic information that provides information on river networks, watershed boundaries, drainage directions and flow accumulations at various scales. For this study, the locations of urban water sources were intersected with HydroSHEDS watershed boundaries to identify the relevant urban watersheds of interest.

#### S-1.2 DISCHARGE AND FLOW REQUIREMENT STATISTICS

##### **Mean annual reliable basin discharge**

[http://atlas.gwsp.org/index.php?option=com\\_content&task=view&id=55&Itemid=68](http://atlas.gwsp.org/index.php?option=com_content&task=view&id=55&Itemid=68)

Reliable mean annual water discharge was estimated from a WaterGAP dataset of reliable monthly water discharge. This dataset presents a gridded global assessment of accumulated runoff (surface runoff plus groundwater recharge). Due to often large temporal variability in river discharge over time, long-term averages may not be particularly good indicators of the volume of water that can be reliability accessed each year. WaterGAP presents the “90% reliable monthly discharge” as an alternative to long-term mean annual discharge. Estimates are “a statistical estimate of the minimum monthly flow which occurs over 90% of the months during the climate normal period (1961-1990)”. These data were used to estimate the mean annual reliable discharge in the basis from which urban areas acquire their water supplies.

##### **Environmental flow requirements**

[http://atlas.gwsp.org/index.php?option=com\\_content&task=view&id=191&Itemid=63](http://atlas.gwsp.org/index.php?option=com_content&task=view&id=191&Itemid=63)

The data used to estimate the volume of water required to maintain freshwater-dependent ecosystems was based on the work done by Smakhtin et al. 2004. This dataset provides a spatially distributed estimate of the fraction of mean annual flow required to maintain ecosystem in “fair condition”, where “fair” implies that the ecosystem endures some level of disturbance such that some sensitive species may have been lost and/or reduced in numbers in

these areas. This category assumes that human disturbances are present (e.g. dams, water diversions and water quality degradation). Assumptions made to quantify the volume of water needed to maintain ecosystems in this condition are based on estimates of appropriate low- and high-flow requirements. Further information on how these flow requirements were calculated can be found in Smakhtin et al. 2004.

### **S-1.3 RESERVOIR SIZE INFORMATION**

#### **Global Reservoir and Dam Database & National Inventory of Dams Database**

<http://sedac.ciesin.columbia.edu/data/set/grand-v1-reservoirs-rev01>

<http://geo.usace.army.mil/nid/index.html>

The GRanD database contains an extensive collection of information on nearly 7,000 dams and reservoirs around the world. Here, the GRanD database served as the primary source for information on reservoir location, storage capacity and surface area. In this study, the mean annual storage capacity of reservoirs was represented by the “normal capacity” data provided. Normal capacity in this context usually refers to the most commonly reported storage value for a given reservoir. In some cases, the normal capacity was estimated using information on dam height and reservoir surface area (see GRanD database Technical documentation for more details). Reservoir surface areas were also derived from reported GRanD values, and are assumed to be the surface area of the reservoir at normal capacity.

The National Inventory of Dams (NID) database was utilized in cases when GRanD data did not exist. The NID database contains much of the same information as GRanD, but focuses specifically on reservoirs in the United States of America. Again, the mean annual storage capacity of reservoirs was assumed to be their “normal storage” which NID defines as “the total storage space in a reservoir below the normal retention level, including dead and inactive storage and excluding any flood control or surcharge storage”. Surface area of the reservoir is given for the impoundment at its normal retention level.

In cases where neither the GRanD nor NID databases provided necessary information, the authors relied on previously published case studies, white literature, and utility websites to estimate reservoir volumes. Estimates of unknown surface areas were made from satellite images of individual reservoirs using Google Earth, and thus may not reflect the surface area at normal storage levels. Reservoir storage estimates included information from only those reservoirs believed to be used for supply (e.g. not smaller storages for local distribution of treated water).

#### **CGIAR CSI- Global Potential Evapo-Transpiration (Global-PET) Geospatial Dataset**

<http://www.cgiar-csi.org/data/global-aridity-and-pet-database>

Based on the assumption that PET is a good surrogate for lake evaporation (Ward and Trimble, 2003), this dataset was used to estimate the volume of water unavailable to urban areas using

reservoirs due to evaporative demands. The Global PET dataset is a high-resolution raster that models monthly and yearly average PET using the WorldClim Global Climate database for input parameters. PET is estimated using a modified Penman-Monteith equation, developed to be particularly amenable to global analyses as it does not require estimations of site-specific parameters. In this study, the mean annual PET was measured at the dam location for each reservoir assessed. Averaged values of mean annual PET were calculated for larger water bodies, specifically the Great Lakes and Lake Victoria. Evaporative losses from reservoirs were calculated as the mean annual PET multiplied by the reported surface area of the reservoir. The volume of water lost to evaporation was then simply subtracted from the mean annual storage capacity of each reservoir.

#### S-1.4 WATER DEMANDS

##### FAO AQUASTAT

<http://www.fao.org/nr/water/aquastat/>

**Human Demands:** We utilized the Food and Agriculture Organization's AQUASTAT database to downscale estimates of national human and agricultural water use statistics to the urban level. Data for the most recent national municipal and human withdrawals came directly from the online database for all countries included in this study. Data were converted to per capita volumes by dividing by the national population.

**Agricultural Demands:** Data on national agricultural water demands were also obtained from AQUASTAT. Here, the volume of water used for agriculture in urban supply basins was determined as the ratio of agricultural to total water withdrawals. This ratio was used to estimate the volume of water in each basin that is allocated for irrigation purposes in basins with >1% of land area devoted to agriculture. The total land under irrigation within each basin was determined by intersecting each urban supply watershed boundary with the gridded estimates of area equipped for irrigation provided within the AQUASTAT database.

##### Projected Estimates of Demand

Estimates of human and agricultural water use in 2040 were based on available national water use statistics from 1965-2010. Projections were made using a simple exponential growth model.

##### Water withdrawals for power plants

[http://atlas.gwsp.org/index.php?option=com\\_content&task=view&id=47&Itemid=68](http://atlas.gwsp.org/index.php?option=com_content&task=view&id=47&Itemid=68)

Estimates of mean annual water usage for thermoelectric withdrawals were made for each water supply basin included in this study. Data were obtained from a publicly available WaterGAP output found on the Global Water Supply Project website.

**Section S-2: Additional Tables**

**Table S-2.1. List of Cities (by country) and their water vulnerability status in 2010 and 2040.**

| <b>City</b>               | <b>Country</b>               | <b>2010<br/>Vulnerability</b> | <b>2040<br/>Vulnerability</b> |
|---------------------------|------------------------------|-------------------------------|-------------------------------|
| Luanda                    | Angola                       | Non-threatened                | Non-threatened                |
| Rajshahi                  | Bangladesh                   | Vulnerable                    | Vulnerable                    |
| La Paz                    | Bolivia                      | Threatened                    | Threatened                    |
| Asunción                  | Brazil                       | Non-threatened                | Non-threatened                |
| Belo Horizonte            | Brazil                       | Threatened                    | Threatened                    |
| Florianópolis             | Brazil                       | Vulnerable                    | Vulnerable                    |
| Fortaleza                 | Brazil                       | Vulnerable                    | Vulnerable                    |
| Salvador                  | Brazil                       | Threatened                    | Threatened                    |
| Teresina                  | Brazil                       | Non-threatened                | Non-threatened                |
| Sofia                     | Bulgaria                     | Threatened                    | Threatened                    |
| <b><i>Ouagadougou</i></b> | <b><i>Burkina Faso</i></b>   | <b><i>Threatened</i></b>      | <b><i>Vulnerable</i></b>      |
| Phnom Penh                | Cambodia                     | Vulnerable                    | Vulnerable                    |
| Yaoundé                   | Cameroon                     | Non-threatened                | Non-threatened                |
| Dalian                    | China                        | Vulnerable                    | Vulnerable                    |
| <b><i>Guangzhou</i></b>   | <b><i>China</i></b>          | <b><i>Threatened</i></b>      | <b><i>Vulnerable</i></b>      |
| <b><i>Nanjing</i></b>     | <b><i>China</i></b>          | <b><i>Threatened</i></b>      | <b><i>Vulnerable</i></b>      |
| Tashkent                  | China                        | Vulnerable                    | Vulnerable                    |
| <b><i>Wuhan</i></b>       | <b><i>China</i></b>          | <b><i>Threatened</i></b>      | <b><i>Vulnerable</i></b>      |
| Barranquilla              | Colombia                     | Threatened                    | Threatened                    |
| Cali                      | Colombia                     | Vulnerable                    | Vulnerable                    |
| Brazzaville               | Democratic Republic of Congo | Threatened                    | Threatened                    |
| Kinshasa                  | Democratic Republic of Congo | Threatened                    | Threatened                    |
| Guayaquil                 | Ecuador                      | Vulnerable                    | Vulnerable                    |
| Alexandria                | Egypt                        | Vulnerable                    | Vulnerable                    |
| Cairo                     | Egypt                        | Vulnerable                    | Vulnerable                    |
| Helsinki                  | Finland                      | Threatened                    | Threatened                    |
| <b><i>Accra</i></b>       | <b><i>Ghana</i></b>          | <b><i>Non-threatened</i></b>  | <b><i>Threatened</i></b>      |
| Kumasi                    | Ghana                        | Threatened                    | Threatened                    |
| Budapest                  | Hungary                      | Threatened                    | Threatened                    |
| Agra                      | India                        | Vulnerable                    | Vulnerable                    |
| Hubli-Dharwad             | India                        | Threatened                    | Threatened                    |
| Kozhikode                 | India                        | Vulnerable                    | Vulnerable                    |
| Pune                      | India                        | Vulnerable                    | Vulnerable                    |
| Ranchi                    | India                        | Threatened                    | Threatened                    |
| Thiruvananthapuram        | India                        | Threatened                    | Threatened                    |
| Baghdad                   | Iraq                         | Vulnerable                    | Vulnerable                    |
| <b><i>Dublin</i></b>      | <b><i>Ireland</i></b>        | <b><i>Threatened</i></b>      | <b><i>Vulnerable</i></b>      |
| Mombasa                   | Kenya                        | Non-threatened                | Non-threatened                |

|                    |                                 |                       |                   |
|--------------------|---------------------------------|-----------------------|-------------------|
| McAllen            | Mexico                          | Vulnerable            | Vulnerable        |
| Maputo             | Mozambique                      | Vulnerable            | Vulnerable        |
| Abuja              | Nigeria                         | Non-threatened        | Non-threatened    |
| Oslo               | Norway                          | Threatened            | Threatened        |
| <b>Panama City</b> | <b>Panama</b>                   | <b>Non-threatened</b> | <b>Threatened</b> |
| Bucharest          | Romania                         | Threatened            | Threatened        |
| Yekaterinburg      | Russia                          | Threatened            | Threatened        |
| <b>Freetown</b>    | <b>Sierra Leone</b>             | <b>Non-threatened</b> | <b>Threatened</b> |
| Seoul              | South Korea                     | Vulnerable            | Vulnerable        |
| Stockholm          | Sweden                          | Threatened            | Threatened        |
| Allepo             | Syria                           | Non-threatened        | Non-threatened    |
| Bangkok            | Thailand                        | Vulnerable            | Vulnerable        |
| Kampala            | Uganda                          | Non-threatened        | Non-threatened    |
| Atlanta            | United States of America        | Vulnerable            | Vulnerable        |
| Austin             | United States of America        | Vulnerable            | Vulnerable        |
| Baltimore          | United States of America        | Threatened            | Threatened        |
| <b>Charlotte</b>   | <b>United States of America</b> | <b>Threatened</b>     | <b>Vulnerable</b> |
| Fort Worth         | United States of America        | Threatened            | Threatened        |
| Louisville         | United States of America        | Threatened            | Threatened        |
| Minneapolis        | United States of America        | Vulnerable            | Vulnerable        |
| Nashville-Davidson | United States of America        | Threatened            | Threatened        |
| New Orleans        | United States of America        | Non-threatened        | Non-threatened    |
| New York           | United States of America        | Threatened            | Threatened        |
| Oklahoma City      | United States of America        | Threatened            | Threatened        |
| Philadelphia       | United States of America        | Vulnerable            | Vulnerable        |
| Pittsburgh         | United States of America        | Vulnerable            | Vulnerable        |
| Providence         | United States of America        | Threatened            | Threatened        |
| Raleigh            | United States of America        | Threatened            | Threatened        |
| Richmond           | United States of America        | Threatened            | Threatened        |
| Saint Louis        | United States of America        | Threatened            | Threatened        |
| <b>Salem</b>       | <b>United States of America</b> | <b>Threatened</b>     | <b>Vulnerable</b> |
| Montevideo         | Uruguay                         | Vulnerable            | Vulnerable        |
| Harare             | Zimbabwe                        | Vulnerable            | Vulnerable        |

\*Bold, italicized items highlight those “cities-of-concern”, who become more vulnerable during the 2010-2040 time period examined.
